# Supplementary material for: Genome-Wide Associations for Microscopic Differential Somatic Cell Count and Specific Mastitis Pathogens in Holstein Cows in Compost-Bedded Pack and Cubicle Farming Systems
Source: MDPI journal article supplement (doi:10.3390/ani11061839), 2021-06-21
Supplement: s1 [file s1]

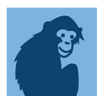

Supplementary Figure 1:

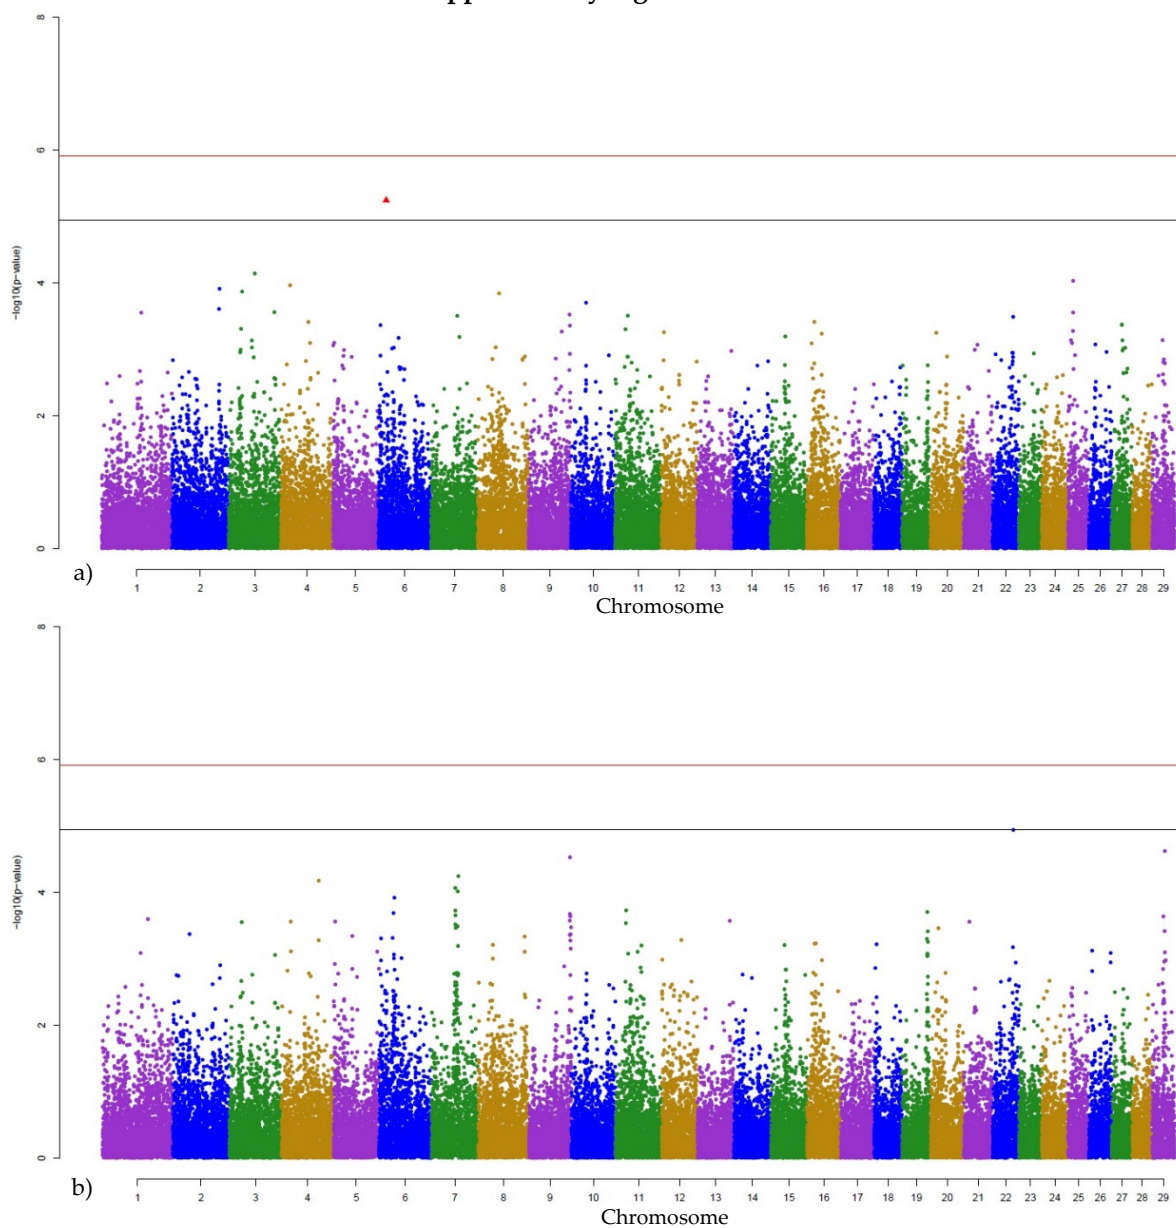

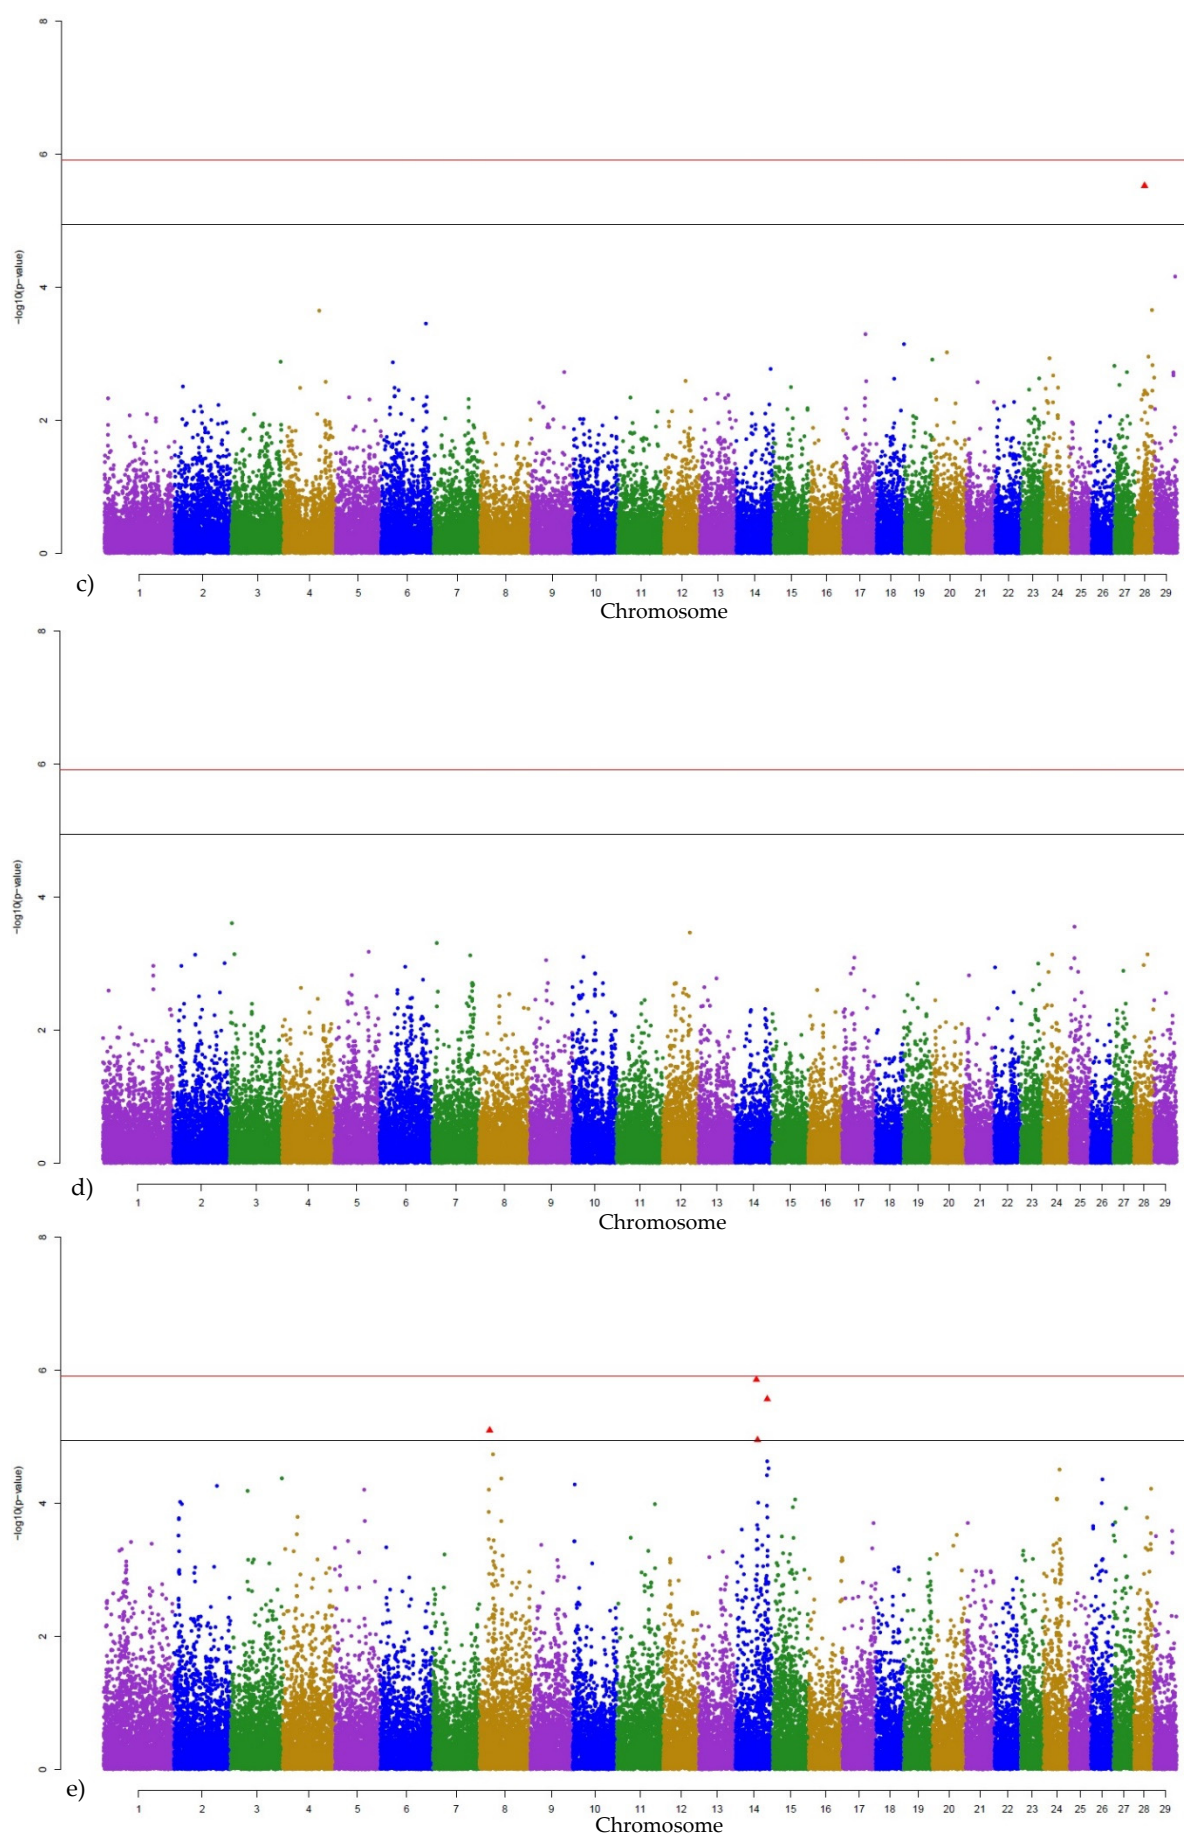

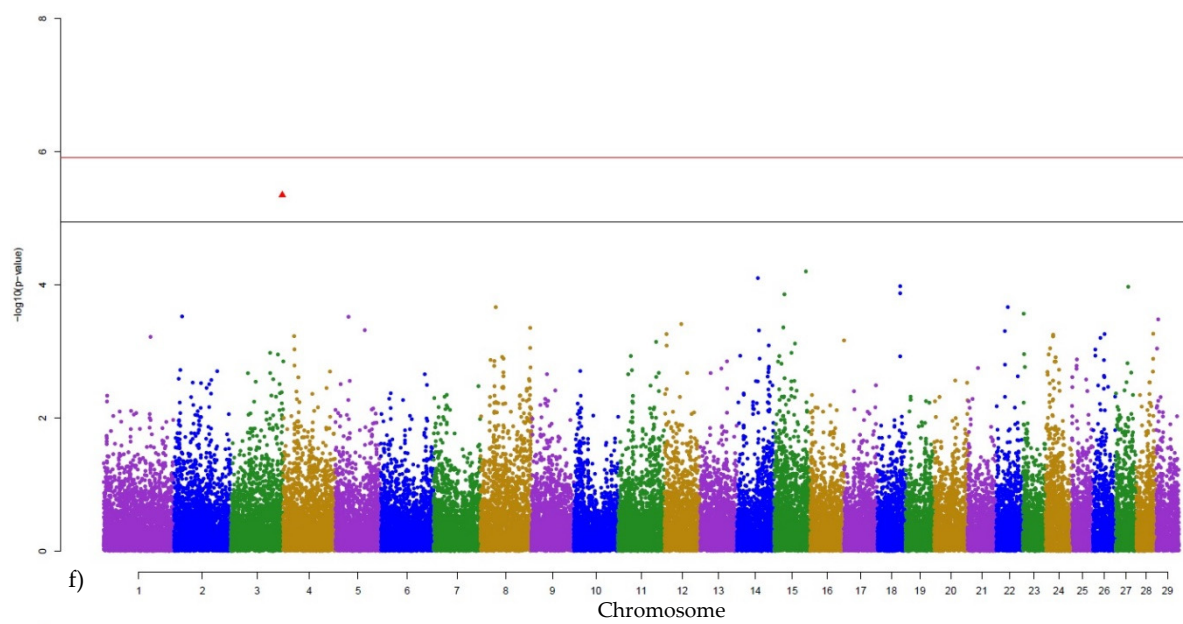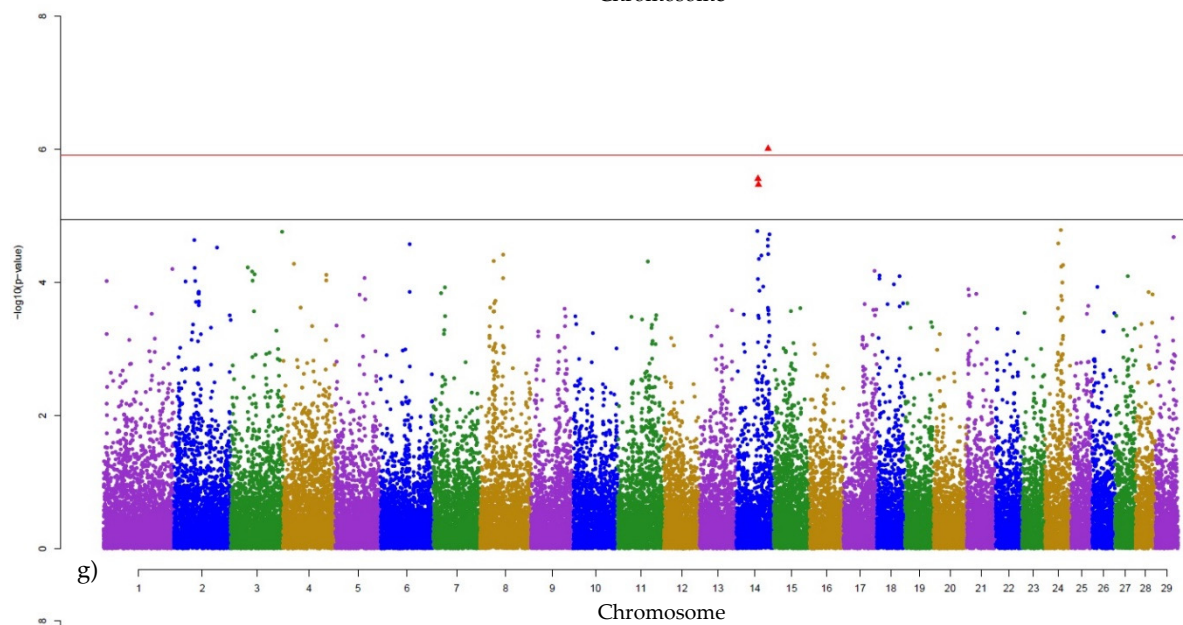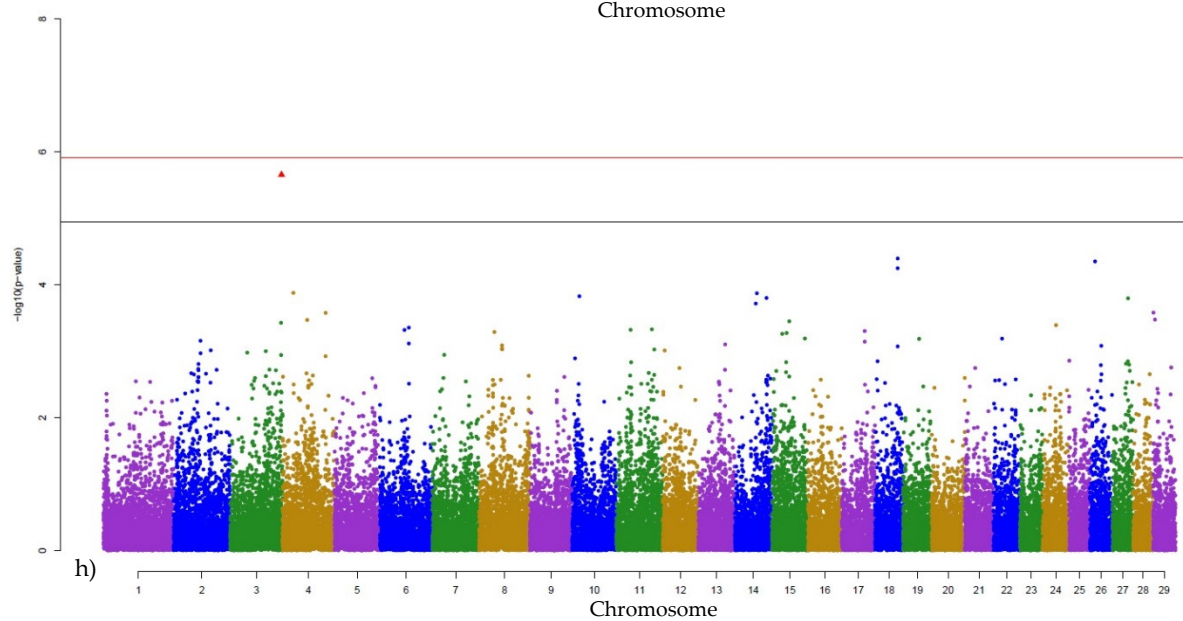



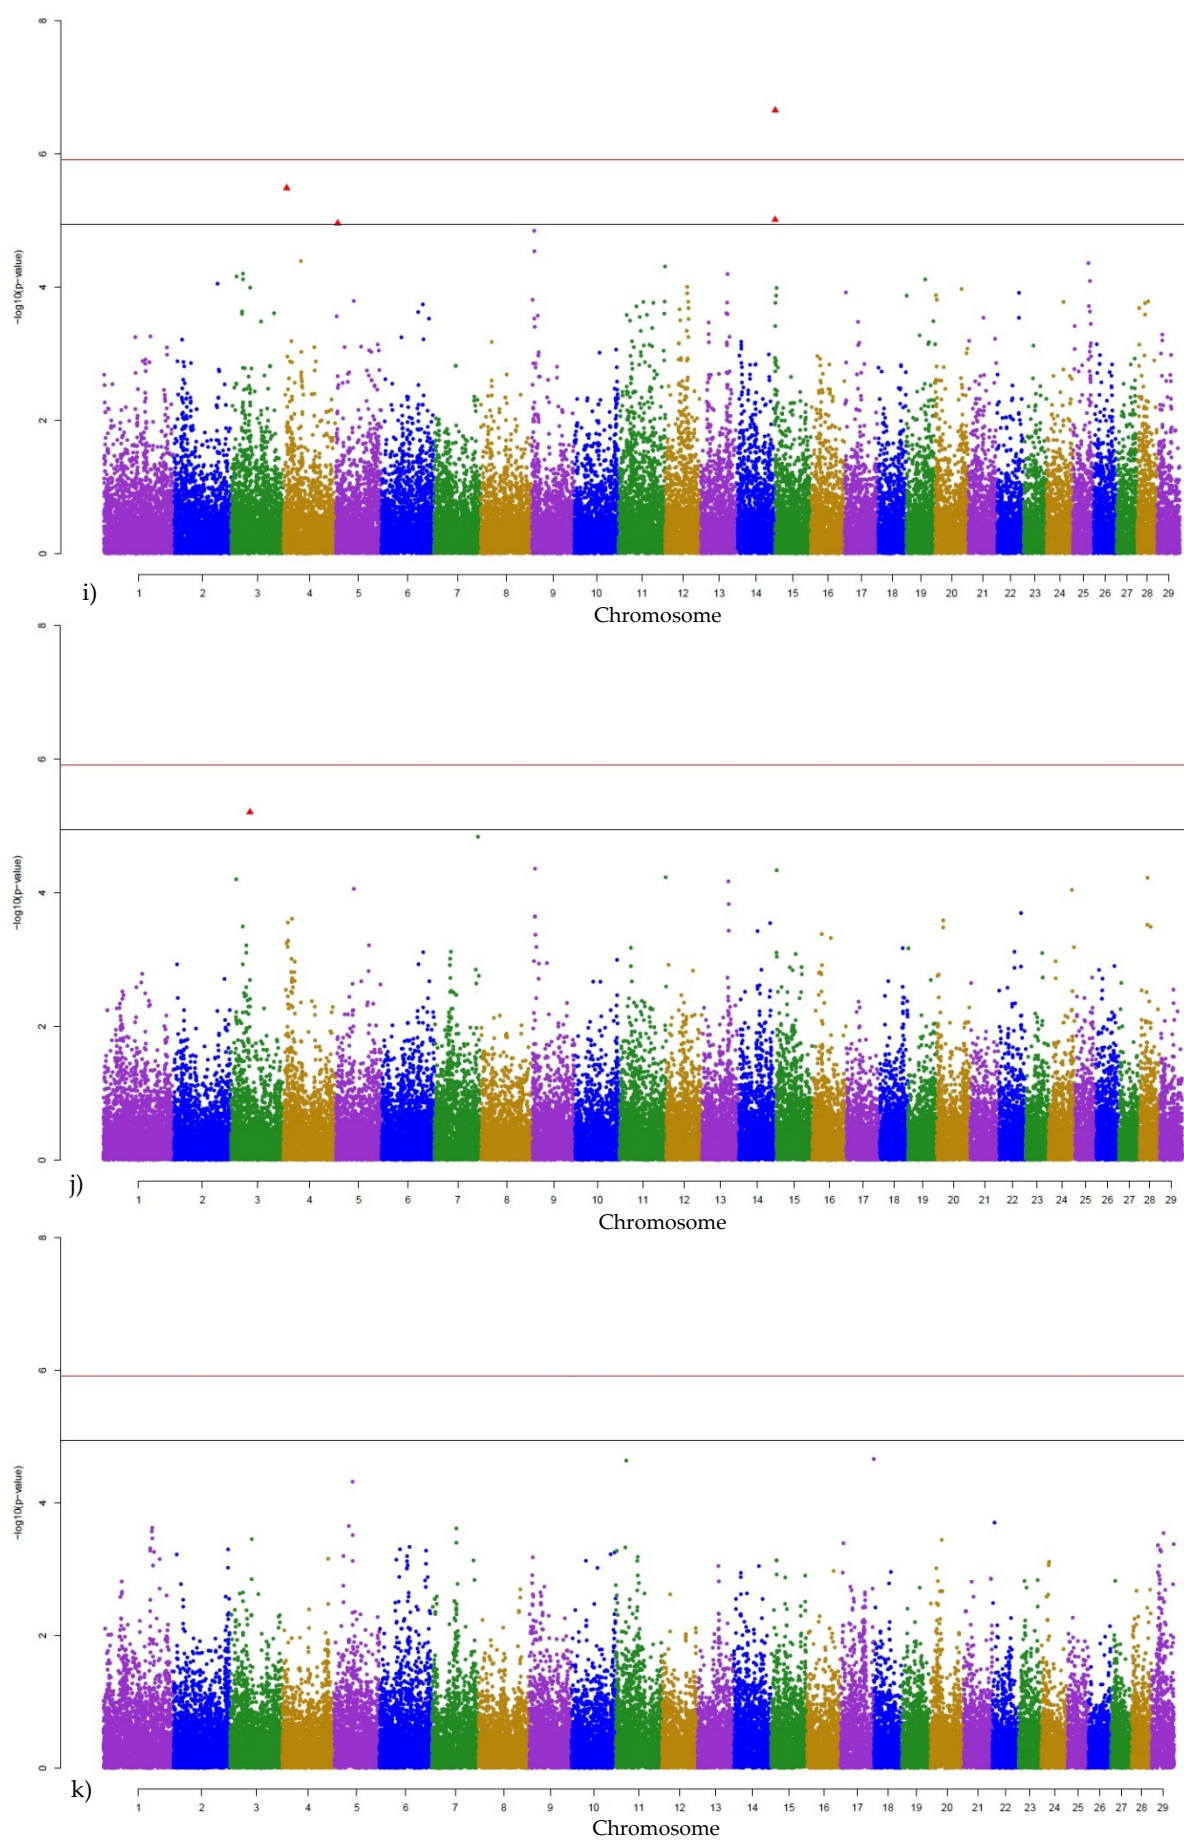

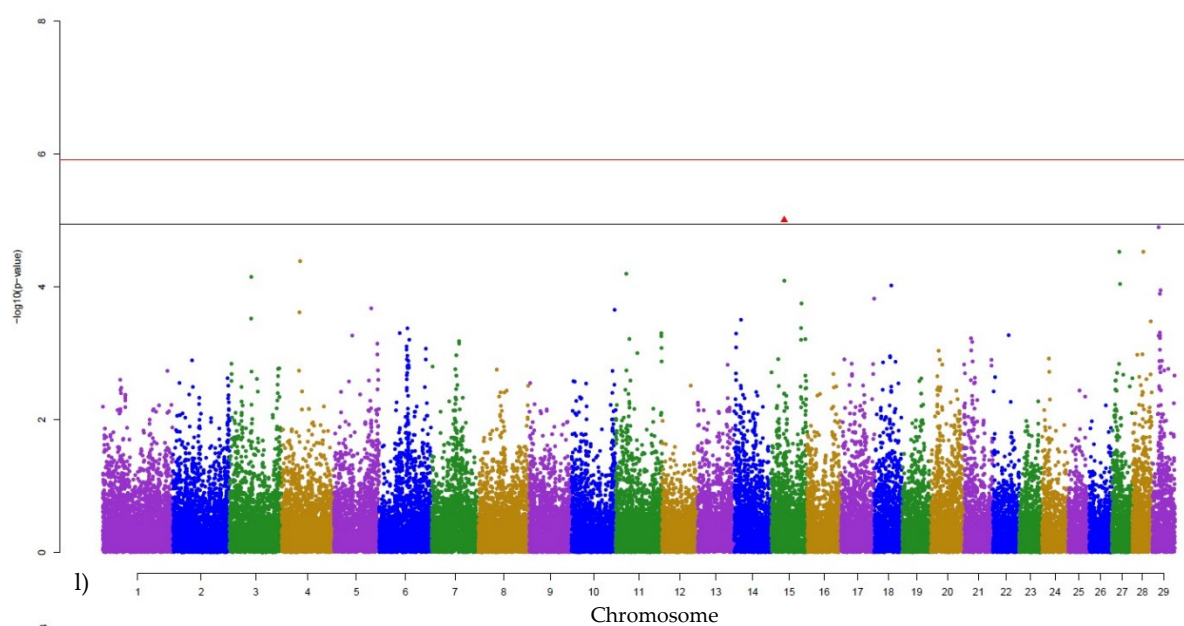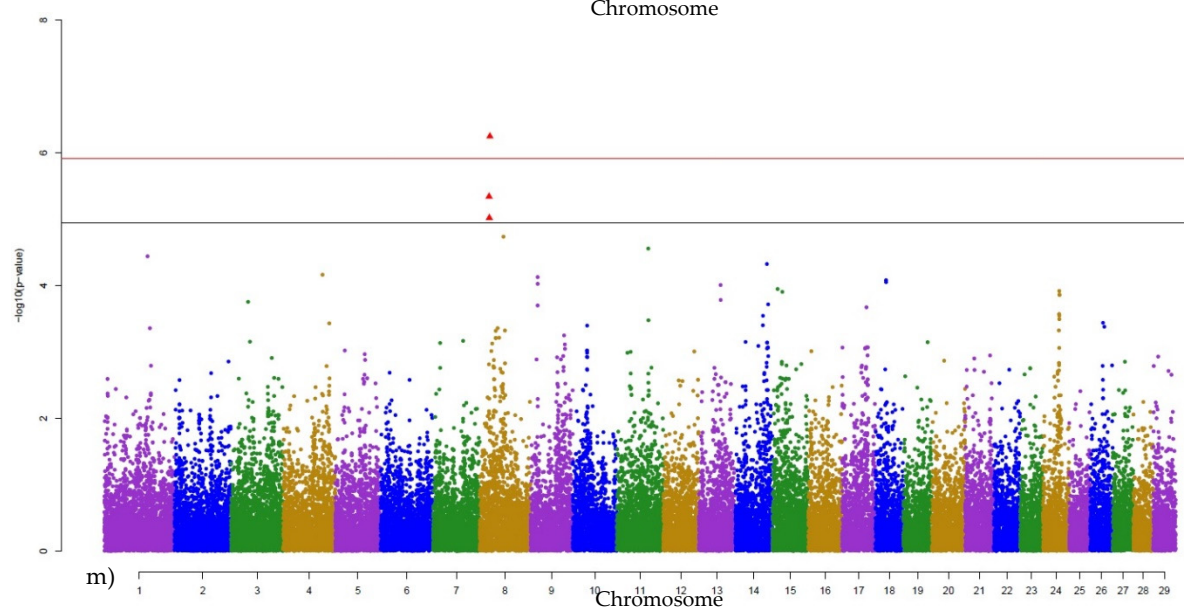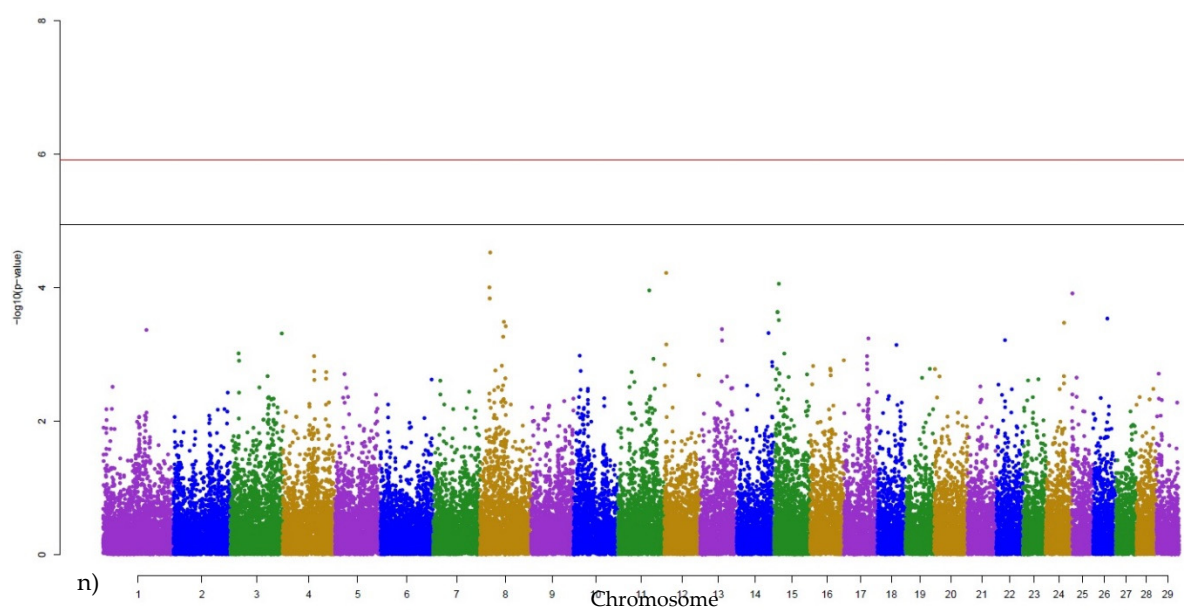

**Supplementary Figure 1.** Manhattan plot displaying the GWAS results (p-values) of the main SNP effects for a) segmented neutrophils, c) banded neutrophils, e) MINOR pathogens (*Coagulase-negative staphylococci* and *Corynebacterium sp.*), g) cultural negative, i) *Aerobic bacilli*, k) *Aesculin hydrolyzing streptococci* and m) *Coagulase-negative staphylococci*. Manhattan plot displaying the GWAS results (p-values) of interaction of the SNP effects and the effects of cows in the housing systems for b) segmented neutrophils, d) banded neutrophils, f) MINOR pathogens (*Coagulase-negative staphylococci* and *Corynebacterium sp.*), h) cultural negative, j) *Aerobic bacilli*, l) *Aesculin hydrolyzing streptococci* and n) *Coagulase-negative staphylococci*. Bonferroni-corrected genome-wide significance (red line) and less conservative threshold (grey line) ( $P_{sugg} = 0.05/4479 = 1.12 \times 10^{-5}$ ) are shown. Red triangles highlight the significant SNP.
